# Supplementary material for: Impact of Care-Recipient Relationship Type on Quality of Life in Community-Dwelling Older Adults With Dementia Over Time
Source: PubMed Central journal article supplement (PMC11089829; doi:10.1177/08919887231215044), 2023-11-11
Supplement: sj-pdf-1-jgp-10.1177_08919887231215044.pdf [file sj-pdf-1-jgp-10.1177_08919887231215044.pdf]

## Appendix I

Care-recipients' quality of life (QoL) outcomes and pertaining questions at the National Health and Aging Trends Study (NHATS)

| QoL                                                                                     | Questions at NHATS                                                                                                                                                                                                                                                                                                                                                                                                                                                                 |
|-----------------------------------------------------------------------------------------|------------------------------------------------------------------------------------------------------------------------------------------------------------------------------------------------------------------------------------------------------------------------------------------------------------------------------------------------------------------------------------------------------------------------------------------------------------------------------------|
| Mental Health<br>(scored 0~12, higher score represents worse mental health)             | <p>“Over the last month, how often have you</p> <p>(a) had little interest or pleasure in doing things;<br/>           (b) felt down, depressed, or hopeless;<br/>           (c) felt nervous, anxious, or on edge;<br/>           (d) been unable to stop or control worrying”.</p> <ul style="list-style-type: none"> <li>Each item is scored on a 4- point scale from “not at all” (0), “several days” (1), “more than half the days” (2) to “nearly every day” (3).</li> </ul> |
| General health<br>(scored 0~4, higher score represents worse health)                    | <p>“Would you say that in general your health is excellent, very good, good, fair, or poor?”</p> <ul style="list-style-type: none"> <li>Response is scored on a 5 scale: excellent (0); very good (1); good (2); fair (3); poor (4)</li> </ul>                                                                                                                                                                                                                                     |
| Pain<br>(scored 0~1, 1 represents pain)                                                 | <p>“In the last month, have you been bothered by pain?”</p> <ul style="list-style-type: none"> <li>Respond “yes” (1) or “no” (0)</li> </ul>                                                                                                                                                                                                                                                                                                                                        |
| Functional Limitations<br>(scored 0~6, higher score represents more severe limitations) | <p>“Whether you received help within the last month with any of the following activities of daily living (ADLs)”:</p> <p>(a) eating<br/>           (b) getting cleaned up<br/>           (c) using the toilet<br/>           (d) dressing<br/>           (e) getting around inside<br/>           (f) getting out of bed?</p> <ul style="list-style-type: none"> <li>Respond “yes” (1) or “no” (0)</li> </ul>                                                                      |

Adapted from NHATS data collection instrument form. Available at [www. NHATS.org](http://www.NHATS.org)

## Appendix II

### *Older adults' socio-demographic characteristics and dementia status*

| Variables, Count (%)  | Round 5<br>(n=1230) | Round 6<br>(n=1137) | Round 7<br>(n=947) | Round 8<br>(n=798) | Round 9<br>(n=673) |
|-----------------------|---------------------|---------------------|--------------------|--------------------|--------------------|
| <b>Sex</b>            |                     |                     |                    |                    |                    |
| Male                  | 405 (32.9)          | 372 (32.7)          | 299 (31.6)         | 251 (31.5)         | 211 (31.4)         |
| Female                | 825 (67.1)          | 765 (67.3)          | 648 (68.4)         | 547 (68.6)         | 462 (68.7)         |
| <b>Age</b>            |                     |                     |                    |                    |                    |
| 65 to 69 yrs          | 84 (6.8)            | 60 (5.3)            | 36 (3.8)           | 17 (2.1)           | 3 (.5)             |
| 70 to 74 yrs          | 174 (14.2)          | 134 (11.8)          | 112 (11.8)         | 88 (11.0)          | 72 (10.7)          |
| 75 to 79 yrs          | 222 (18.1)          | 190 (16.7)          | 150 (15.8)         | 125 (15.7)         | 107 (15.9)         |
| 80 to 84 yrs          | 272 (22.1)          | 199 (17.5)          | 178 (18.8)         | 154 (19.3)         | 129 (19.2)         |
| 85 to 89 yrs          | 256 (20.8)          | 214 (18.8)          | 175 (18.5)         | 152 (19.1)         | 127 (18.9)         |
| 90+ yrs               | 222 (18.1)          | 208 (18.3)          | 185 (19.5)         | 155 (19.4)         | 148 (22.0)         |
| <b>Race/ethnicity</b> |                     |                     |                    |                    |                    |

|                                       |            |            |            |            |            |
|---------------------------------------|------------|------------|------------|------------|------------|
| Non- Hispanic White                   | 735 (60.2) | 682 (60.0) | 576 (60.8) | 481 (60.3) | 398 (59.1) |
| Non- Hispanic Black                   | 386 (31.6) | 353 (31.1) | 285 (30.1) | 246 (30.8) | 216 (32.1) |
| Hispanic                              | 62 (5.1)   | 59 (5.2)   | 53 (5.6)   | 42 (5.3)   | 34 (5.1)   |
| Other                                 | 39 (3.2)   | 35 (3.1)   | 27 (2.9)   | 24 (3.0)   | 20 (3.0)   |
| <b>Annual Income</b>                  |            |            |            |            |            |
| <1st quartile (<13000)                | 305 (24.8) |            |            |            |            |
| 1st-2nd quartiles (>=13000 & <22000)  | 309 (25.1) |            |            |            |            |
| 2nd-3rd quartiles (>=22000 & <=40000) | 333 (27.1) |            |            |            |            |
| > 3rd quartile (>40000)               | 283 (23.0) |            |            |            |            |
| <b>Education</b>                      |            |            |            |            |            |
| Below high school                     | 412 (33.8) |            |            |            |            |
| High school                           | 360 (29.5) |            |            |            |            |
| Above high school below Bachelor      | 271 (22.2) |            |            |            |            |
| Bachelor and above                    | 177 (14.5) |            |            |            |            |
| <b>Marital status</b>                 |            |            |            |            |            |
| Married/living with a partner         | 532 (43.3) | 415 (41.4) | 336 (40.5) | 277 (40.6) | 232 (40.0) |
| Unmarried                             | 698 (56.8) | 587 (58.6) | 494 (59.5) | 405 (59.4) | 350 (60.1) |
| <b>Living arrangements</b>            |            |            |            |            |            |
| Alone                                 | 249 (20.2) | 228 (20.1) | 199 (21.0) | 169 (21.2) | 148 (22.0) |
| With spouse/partner only              | 376 (30.6) | 283 (24.9) | 228 (24.1) | 180(22.6)  | 162 (24.1) |
| With spouse/partner and others        | 146 (11.9) | 117 (10.3) | 97 (10.2)  | 84 (10.5)  | 63 (9.4)   |
| With others only                      | 459 (37.3) | 374 (32.9) | 306 (32.3) | 249 (31.2) | 209 (31.1) |
| <b>Dementia status</b>                |            |            |            |            |            |
| Probable dementia                     | 371 (30.2) | 340 (30.0) | 258 (27.3) | 194 (24.3) | 141 (21.0) |
| Possible dementia                     | 179 (14.6) | 165 (14.5) | 126 (13.3) | 106 (13.3) | 88 (13.1)  |
| No dementia                           | 678 (55.2) | 630 (55.5) | 562 (59.4) | 497 (62.4) | 443 (65.9) |

% percentage

### Appendix III

#### Comparison between Non-response and Sample in Round 5

| Variables, count (percentage) | Non-response<br>(n=557) | Sample in Round 5<br>(n=1230) |
|-------------------------------|-------------------------|-------------------------------|
| <b>Age</b>                    |                         |                               |
| 65 to 69 yrs                  | 40 (7.2)                | 79 (5.7)                      |
| 70 to 74 yrs                  | 95 (17.1)               | 137 (11.1)                    |
| 75 to 79 yrs                  | 92 (16.5)               | 210 (17.1)                    |
| 80 to 84 yrs                  | 125 (22.4)              | 276 (22.4)                    |
| 85 to 89 yrs                  | 107 (19.2)              | 275 (22.4)                    |
| 90+ yrs                       | 98 (17.6)               | 262 (21.3)                    |

chi2(5) = 16.1854 P= 0.006

#### Dementia status

|                   |            |            |
|-------------------|------------|------------|
| Probable dementia | 163 (29.4) | 438 (35.6) |
| Possible dementia | 83 (15.0)  | 187 (15.2) |
| No dementia       | 309 (55.7) | 604 (49.2) |

chi2(2) = 7.6637 P= 0.022

## Appendix IV

### *Changes in each QoL subscale over 4 years (2015-2019)*

| <b>Variables, count (percentage)</b> | 2015       | 2016       | 2017       | 2018       | 2019       |
|--------------------------------------|------------|------------|------------|------------|------------|
| <b>Pain</b>                          |            |            |            |            |            |
| Not reporting pain                   | 372 (30.3) | 303 (30.3) | 280 (33.8) | 217 (31.9) | 166 (28.6) |
| Reporting pain                       | 854 (69.7) | 696 (69.7) | 547 (66.1) | 463 (68.1) | 415 (71.4) |
| <b>PHQ4</b>                          |            |            |            |            |            |
| Low (PHQ4>=0, <=2)                   | 646 (53.7) | 523 (53.8) | 415 (52.3) | 353 (53.4) | 309 (54.7) |
| Symptomized (PHQ4>2, <=12)           | 556 (46.3) | 450(46.3)  | 378 (47.7) | 308 (46.6) | 256 (45.3) |
| <b>General health</b>                |            |            |            |            |            |
| Excellent                            | 47 (3.8)   | 44 (4.4)   | 35 (4.2)   | 33 (4.9)   | 18 (3.1)   |
| Very good                            | 166 (13.5) | 160 (16.0) | 128 (15.4) | 108 (15.9) | 91 (15.7)  |
| Good                                 | 412 (33.5) | 335 (33.4) | 279 (33.6) | 210 (30.8) | 199 (34.3) |
| Fair                                 | 429 (34.9) | 337 (33.6) | 270 (32.5) | 233 (34.2) | 196 (33.8) |
| Poor                                 | 175 (14.2) | 126 (12.6) | 118 (14.2) | 97 (14.2)  | 76 (13.1)  |
| <b>Functional limitations</b>        |            |            |            |            |            |
| Not receiving help with any ADL      | 481 (39.9) | 440 (41.0) | 356 (40.3) | 275 (37.6) | 233 (37.2) |
| Receiving help with 1 ADL            | 315 (26.1) | 203 (18.9) | 154 (17.4) | 126 (17.2) | 99 (15.8)  |
| Receiving help with 2 ADLs           | 135 (11.2) | 119 (11.1) | 103 (11.7) | 83 (11.4)  | 77 (12.3)  |
| Receiving help with 3 ADLs           | 72 (6.0)   | 68 (6.3)   | 62 (7.0)   | 55 (7.5)   | 44 (7.0)   |
| Receiving help with 4 ADLs           | 73 (6.1)   | 56 (5.2)   | 64 (7.2)   | 51 (7.0)   | 39 (6.2)   |
| Receiving help with 5 ADLs           | 54 (4.5)   | 82 (7.6)   | 62 (7.0)   | 62 (8.5)   | 57 (9.1)   |
| Receiving help with 6 ADLs           | 75 (6.2)   | 105 (9.8)  | 83 (9.4)   | 79 (10.8)  | 77 (12.3)  |
